# Supplementary material for: Energetics and kinetics of alkali ion exchange in analcime
Source: Royal Society of Chemistry journal article supplement (doi:10.1039/d5cp02373d), 2025-01-01
Supplement: d5cp02373d1.pdf [file d5cp02373d1.pdf]

## SUPPLEMENTAL INFORMATION

### **Energetics and Kinetics of Alkali Ion Exchange in Analcime**

Jinyi Liu (刘金芝)<sup>1</sup>, An T. Ta<sup>1\*</sup>, R. Seaton Ullberg<sup>1\*\*</sup>, Michael Badawi<sup>2</sup>, Jean Wilfried Houndfodji<sup>2</sup>, Hans-Conrad zur Loye<sup>3</sup> and Simon R. Phillpot<sup>1\*\*\*</sup>

1. Department of Materials Science and Engineering, University of Florida, Gainesville FL 32611, USA
2. Laboratoire Lorrain de Chimie Moléculaire L2CM, Université de Lorraine, CNRS, F-54000 Nancy, France
3. Center for Hierarchical Waste Form Materials and Department of Chemistry and Biochemistry, University of South Carolina, Columbia, South Carolina 29208, USA

### **Analcime Framework**

Analcime has a complex framework, making it a challenge to show all features in 2D figures. Additional views of the cage, 8-member ring and 6-member ring from different angles are presented in Figure S1.

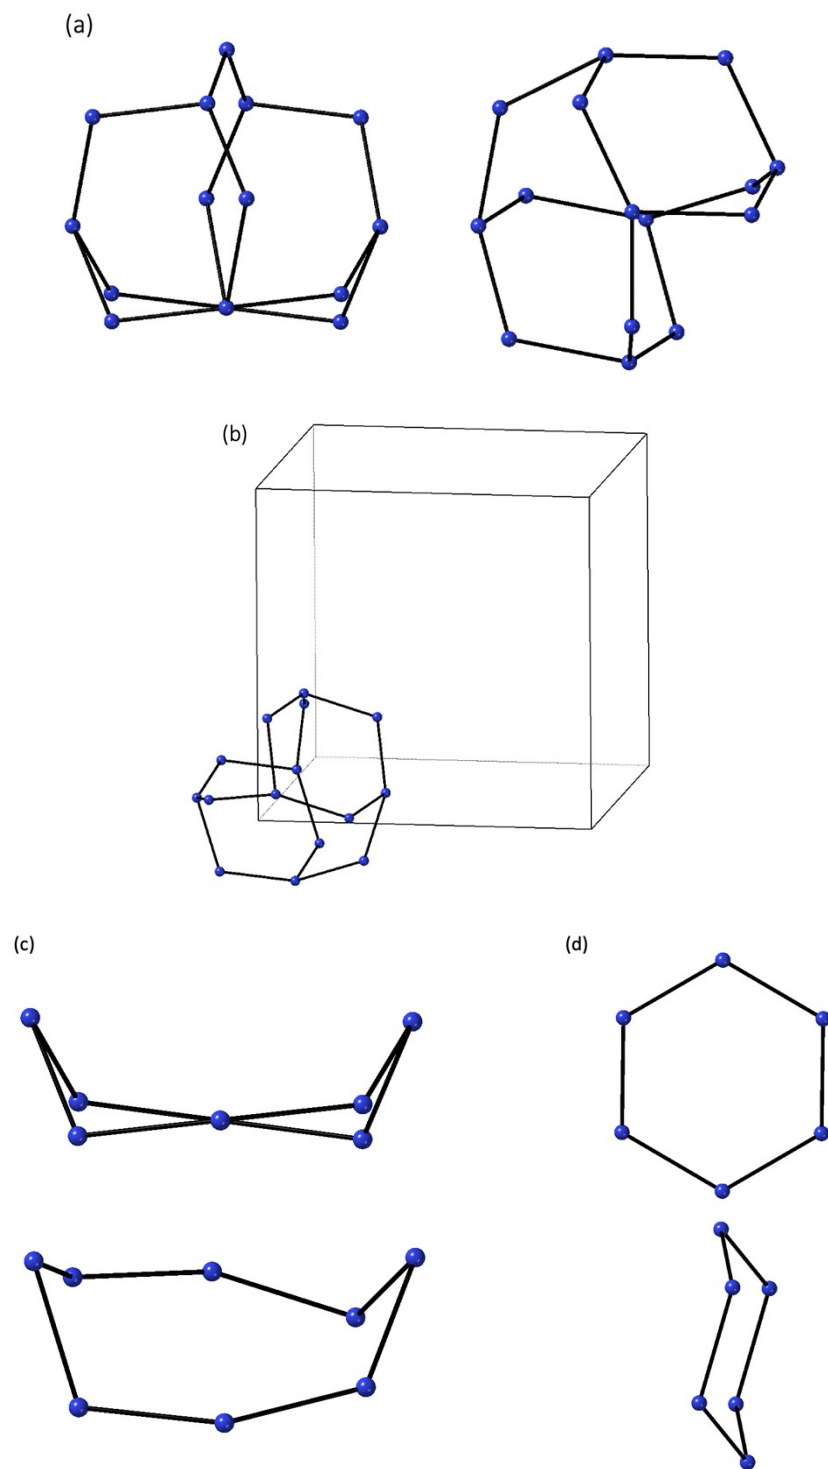

Figure S1:( a) two views of a single cage of 3 eight-member rings and 2 six-member rings, (b) a cage at left corner shared by four unit cells, Two views of (c) a single 8-member ring and (d) a 6-member ring.

# The Energetics Associated with Ion Exchange

## All $\text{Na}^+$ and $\text{Cs}^+$ sites in Analcime Framework

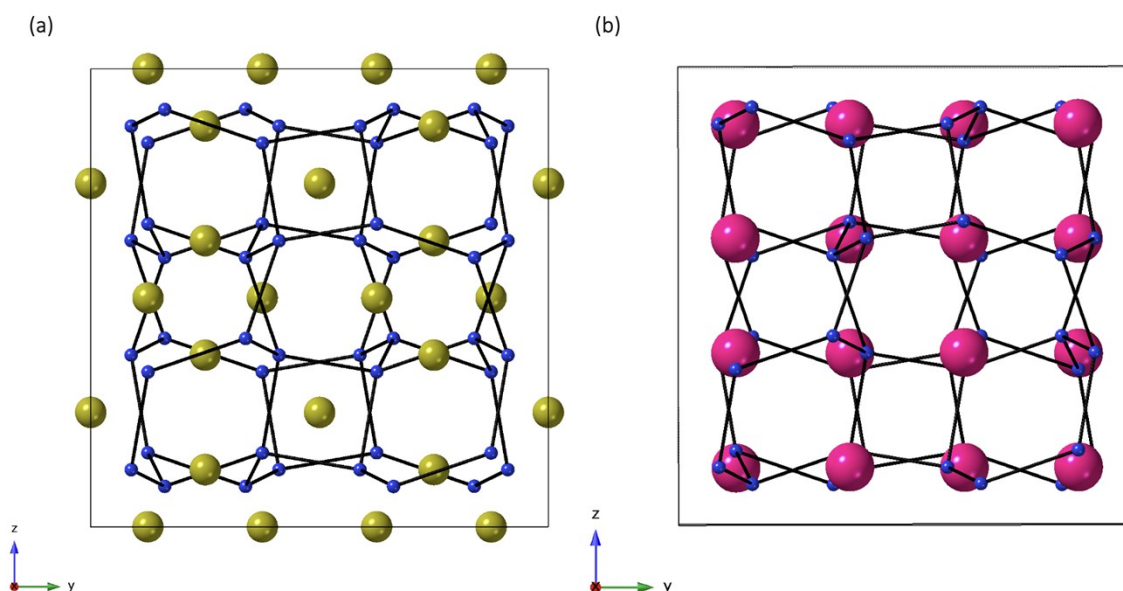

Figure S2: (a) 24 8-member ring sites( $\text{Na}^+$ ) in analcime framework, (b) 16 cage sites( $\text{Cs}^+$ ) in analcime framework.

## Reference State of Hydration Ions

Figure S3 illustrates the hydration states of  $\text{Na}^+$  and  $\text{Cs}^+$  adopted in calculation, where  $\text{Na}^+$  is hydrated by 4 water molecules and  $\text{Cs}^+$  by 10 water molecules. Table S1 shows the total energy of hydrated  $\text{Na}^+$  and  $\text{Cs}^+$ .

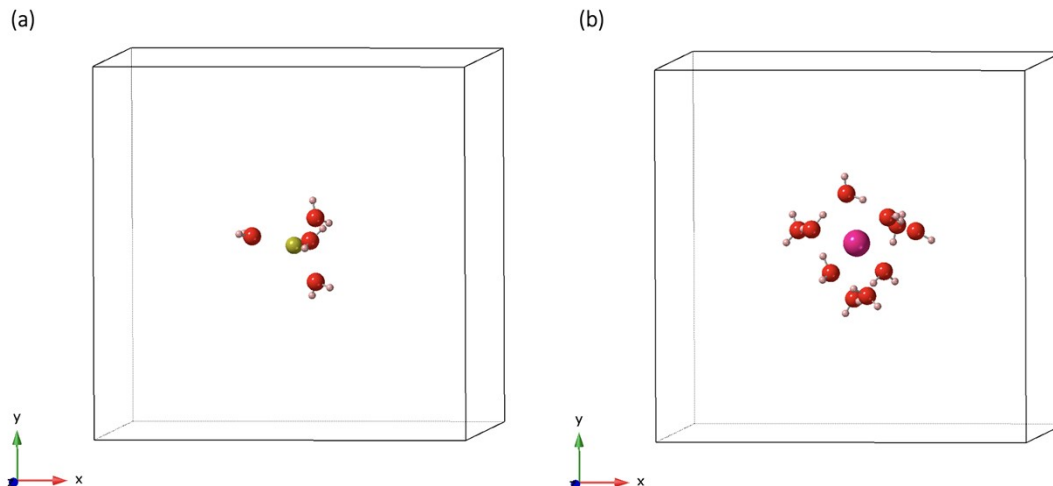

Figure S3: in a 20x20x20 Å vacuum box (a) a  $\text{Cs}^+$  coordinated with 10 water molecules, (b) a  $\text{Na}^+$  coordinated with 4 water molecules.

For hydrated  $\text{Li}^+$ ,  $\text{Rb}^+$  and  $\text{K}^+$ , the total energy is obtained from the previous group member An, Ta<sup>[1]</sup>, where the water molecule coordination for Li and K is 4<sup>[2][3]</sup>, for larger Rb is 8<sup>[4]</sup>.

Table S1: Total Energy of Hydrated Ions

| Ion species                            | Total Energy(eV) |
|----------------------------------------|------------------|
| $(\text{H}_2\text{O})_{17}$            | -251.81          |
| $\text{Li}^+$                          | 5.30             |
| $\text{Na}^+$                          | 5.13             |
| $\text{K}^+$                           | 4.29             |
| $\text{Rb}^+$                          | 4.13             |
| $\text{Cs}^+$                          | 3.85             |
| $\text{Li}^+(\text{H}_2\text{O})_4$    | -56.36           |
| $\text{Na}^+(\text{H}_2\text{O})_4$    | -55.27           |
| $\text{K}^+(\text{H}_2\text{O})_4$     | -55.26           |
| $\text{Rb}^+(\text{H}_2\text{O})_8$    | -114.44          |
| $\text{Cs}^+(\text{H}_2\text{O})_{10}$ | -144.93          |

### Reference State of the Water Molecule

Seventeen water molecules are placed disorderly in an  $8 \times 8 \times 8$  Å vacuum box. The calculated total energy of this water cluster is -251.81eV, averaged to one molecule is -14.85eV.

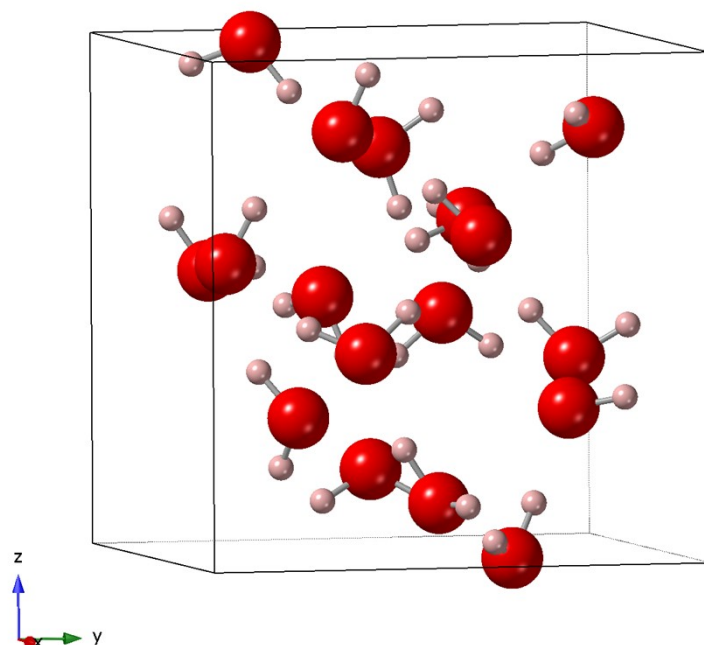

Figure S4: Disordered H<sub>2</sub>O cluster in an 8×8×8 Å vacuum box.

### **Total Energy of analcime system incorporating one ion**

Table S2 and S3 are calculated total energy of analcime containing one Al and one ion by DFT.

Table S2: Total Energy of NaAlANA containing 1 Al and 1 Na<sup>+</sup>

| Ion species | Total Energy(eV) |
|-------------|------------------|
| A1          | -1150.44         |
| A2          | -1150.44         |
| B1          | -1150.61         |
| B2          | -1150.61         |
| C1          | -1150.62         |
| C2          | -1150.62         |
| C3          | -1150.62         |
| C4          | -1150.62         |

Table S3: Total Energy of CsAlANA containing 1Al and 1 Cs<sup>+</sup>

| Al position | Total Energy(eV) |
|-------------|------------------|
| Type I      | -1152.60         |
|             | -1152.60         |
|             | -1152.60         |
|             | -1152.60         |
|             | -1152.60         |
|             | -1152.60         |
| Type II     | -1152.67         |
|             | -1152.67         |
|             | -1152.67         |
| Type III    | -1152.75         |
|             | -1152.75         |
|             | -1152.75         |
|             | -1152.75         |
|             | -1152.75         |
|             | -1152.75         |

The calculated total energy of charged system AlANA<sup>-</sup> is -1144.66eV. Introducing an Al will also bring a negative charge defect, and to compensate the charge state, the background charge is reduced by one in DFT calculation.

## Total Energy and Exchange Energy of Li<sup>+</sup>, K<sup>+</sup> and Rb<sup>+</sup>

Since Na<sup>+</sup> and Cs<sup>+</sup> relative energies reflect the symmetry of 8-member rings and cavities. For other species Li<sup>+</sup>, K<sup>+</sup> and Rb<sup>+</sup>, only one site for each type of Al site is calculated. Tables S4 and S5 gives total energy and exchange energy of Li<sup>+</sup>, K<sup>+</sup> and Rb<sup>+</sup>, where K<sup>+</sup> and Rb<sup>+</sup> follow same order of energy with Cs<sup>+</sup>, but for Li<sup>+</sup>, different from Na<sup>+</sup>, Al at B site has more negative value than Al at C site. The exchange energy of Li<sup>+</sup> and K<sup>+</sup> with Na has positive values, which means the exchange process is not thermodynamically feasible.

Table S4: Total energy for ions at different Al positions

| Ion species | Al position | Total Energy(eV) |
|-------------|-------------|------------------|
| Li          | A           | -1151.45         |
|             | B           | -1151.88         |
|             | C           | -1151.73         |
| K           | I           | -1150.66         |
|             | II          | -1150.78         |
|             | III         | -1150.85         |
| Rb          | I           | -1150.86         |
|             | II          | -1151.99         |
|             | III         | -1150.04         |

Table S5: Exchange energy of ions with Na<sup>+</sup> at different Al positions

| Al position  |            | Exchange Energy(eV) |
|--------------|------------|---------------------|
| LiAlANA(A)   | NaAlANA(A) | 0.56                |
| LiAlANA(B)   | NaAlANA(B) | 0.30                |
| LiAlANA(C)   | NaAlANA(C) | 0.46                |
| KAlANA(I)    | NaAlANA(C) | 0.43                |
| KAlANA(II)   | NaAlANA(C) | 0.31                |
| KAlANA(III)  | NaAlANA(A) | 0.06                |
| KAlANA(III)  | NaAlANA(B) | 0.23                |
| RbAlANA(I)   | NaAlANA(C) | 0.01                |
| RbAlANA(II)  | NaAlANA(C) | -0.11               |
| RbAlANA(III) | NaAlANA(A) | -0.34               |
| RbAlANA(III) | NaAlANA(B) | -0.17               |

## Migration Energy

Depending on Al position, the NEB profile maybe unsymmetrical. Here, more migration paths are presented.

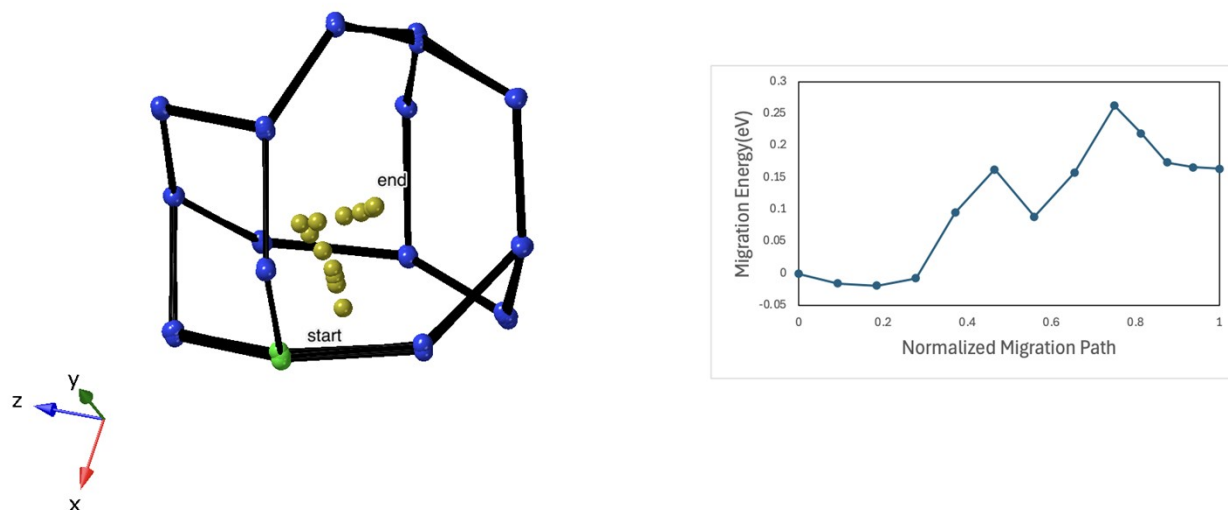

Figure S5: Migration energy profile for Na<sup>+</sup>, where Al is at B site for initial 8-member ring and A site for ending 8-member ring.

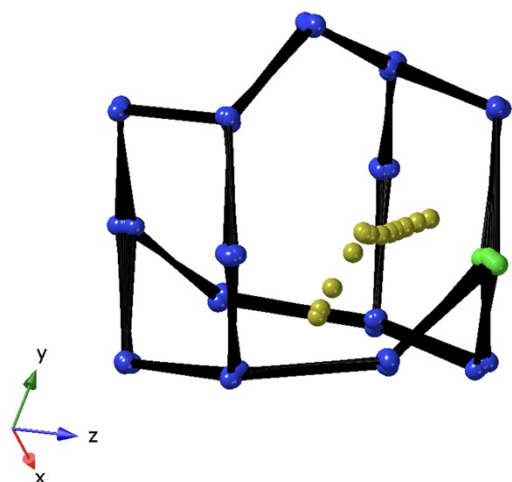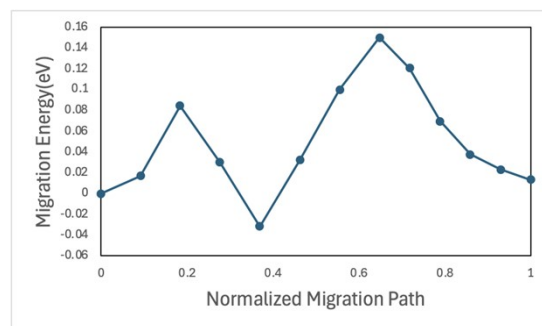

Figure S6: Migration energy profile for  $\text{Na}^+$ , where Al is at A site for initial 8-member ring and ends at 6-member ring.

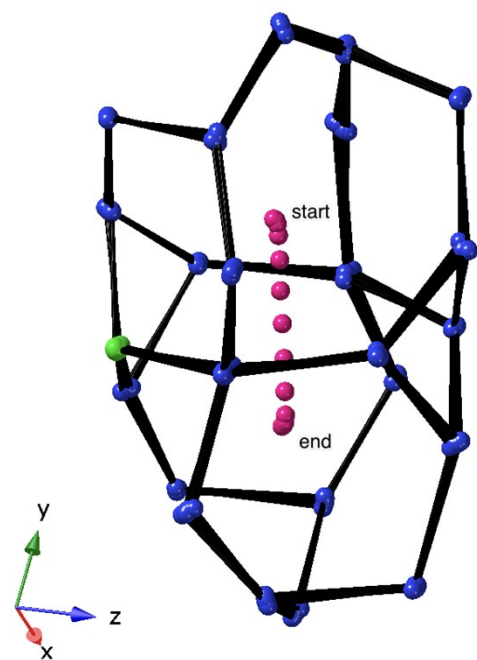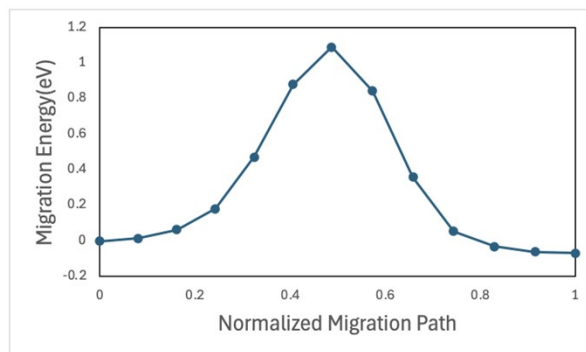

Figure S7: Migration energy profile for  $\text{Cs}^+$  through 8-member ring channel, where Al is at I site for initial cage and III site for ending ring.



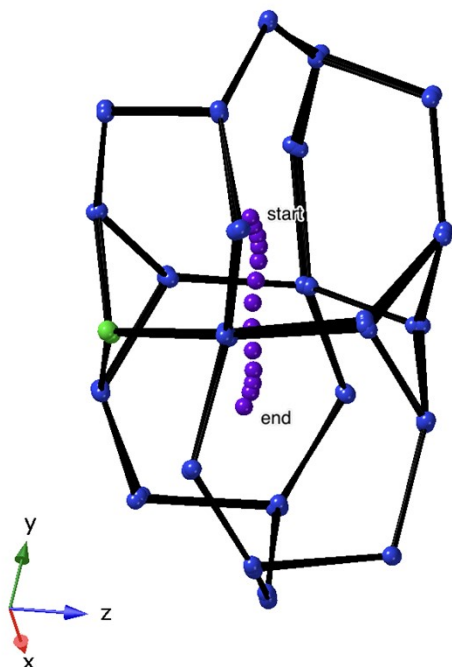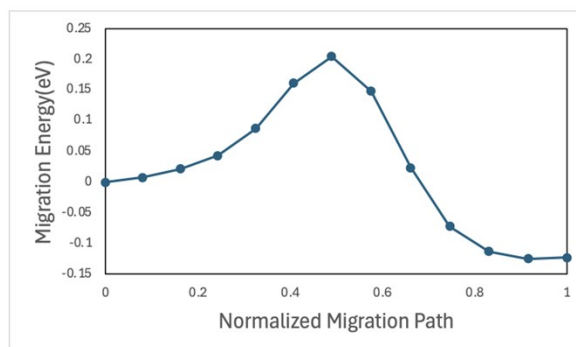

Figure S8: Migration energy profile for  $K^+$  through 8-member ring channel, where Al is at I site for initial cage and III site for ending ring.

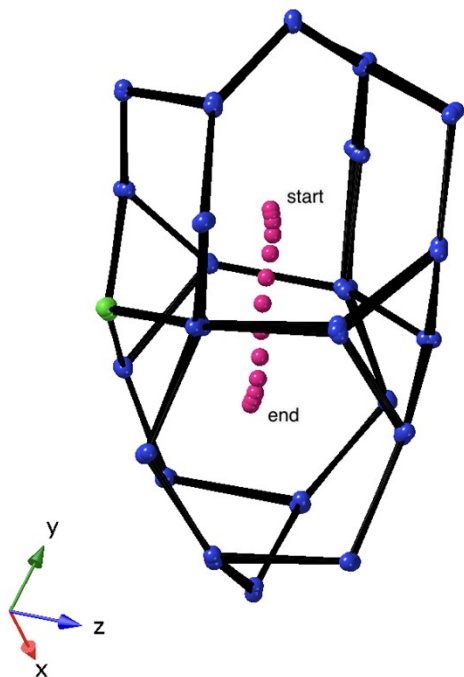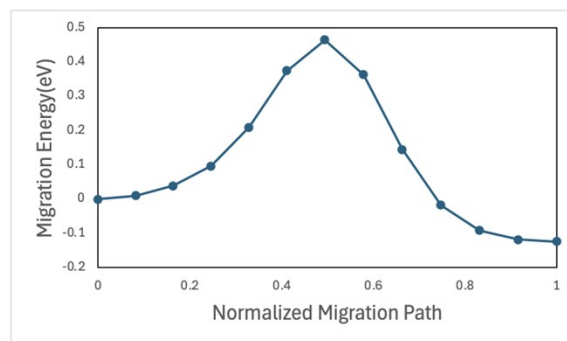

Figure S9: Migration energy profile for  $Rb^+$  through 8-member ring channel, where Al is at I site for initial cage and III site for ending ring.

## References

- [1] Ta, A. T.; Daouli, A.; Ullberg, R. S.; Fonseca, E.; Proust, V.; Grandjean, A.; Hennig, R. G.; zur Loye, H.-C.; Badawi, M.; Phillpot, S. R. Incorporating Solvent Effects in DFT: Insights from Cation Exchange in Faujasites. *Phys. Chem. Chem. Phys.* 2024, 26, 14561–14572. DOI: 10.1039/d4cp00467a.
- [2] Varma, S.; Rempe, S. B. Coordination Numbers of Alkali Metal Ions in Aqueous Solutions. *Biophys. Chem.* 2006, 124, 192–199. DOI: 10.1016/j.bpc.2006.07.002.
- [3] Smirnov, P. R.; Trostin, V. N. Structure of the Nearest Surrounding of the Na<sup>+</sup> Ion in Aqueous Solutions of Its Salts. *Russ. J. Gen. Chem.* 2007, 77, 844–850. DOI: 10.1134/S1070363207050052.
- [4] Caralampio, D. Z.; Martínez, J. M.; Pappalardo, R. R.; Marcos, E. S. The Hydration Structure of the Heavy-Alkalines Rb<sup>+</sup> and Cs<sup>+</sup> through Molecular Dynamics and X-Ray Absorption Spectroscopy: Surface Clusters and Eccentricity. *Phys. Chem. Chem. Phys.* 2017, 19, 28993–29004. DOI: 10.1039/c7cp05346k.
